# Supplementary material
Source: PubMed Central journal article supplement (PMC4239305)
Supplement: supp_JCO.2014.57.6264_DS_JCO.2014.57.6264.pdf [file supp_JCO.2014.57.6264_DS_JCO.2014.57.6264.pdf]

July 24, 2014

**The impact of re-irradiation of painful osseous metastases on quality of life and function: A secondary analysis of the NCIC SC.20 randomized trial**

**Chow, et al**

**Appendix 1: Baseline data of patients included in the BPI analysis**

N= 471

|                                     |            |
|-------------------------------------|------------|
| <b>Treatment Arm</b>                |            |
| Single (8Gy)                        | 233 (49.5) |
| Multiple(20Gy)                      | 238 (50.5) |
| <b>Age (years)</b>                  |            |
| Mean                                | 65.2       |
| Std                                 | 11.49      |
| Median                              | 65.6       |
| <b>Gender</b>                       |            |
| Female                              | 200 (42.5) |
| Male                                | 271 (57.5) |
| <b>Primary Malignancy</b>           |            |
| Prostate                            | 141 (29.9) |
| Breast                              | 140 (29.7) |
| Lung                                | 89 (18.9)  |
| Kidney                              | 19 (4.0)   |
| Colon                               | 18 (3.8)   |
| Esophageal                          | 7 (1.5)    |
| Other                               | 34 (7.2)   |
| Unknown                             | 14 (3.0)   |
| <b>Karnofsky Performance status</b> |            |
| Unknown                             | 4 (0.8)    |
| 50-60                               | 83 (17.6)  |
| 70-80                               | 260 (55.2) |
| 90-100                              | 124 (26.3) |
| <b>Worst Pain at Baseline</b>       |            |
| 2-4                                 | 67 (14.3)  |
| 5-6                                 | 131 (27.8) |
| 7-10                                | 269 (57.2) |
| <b>Site of Painful Lesion</b>       |            |
| Head and Neck                       | 1 (0.2)    |
| Lower limbs                         | 26 (5.5)   |
| Upper limbs                         | 39 (8.3)   |
| Pelvis/Hips                         | 169 (35.9) |
| Cervical spine                      | 5 (1.1)    |
| Cervicothoracic spine               | 8 (1.7)    |
| Lumbosacral spine                   | 86 (18.3)  |
| Thoracic spine                      | 47 (10.0)  |
| Thoracolumbar spine                 | 34 (7.2)   |
| Superficial bones                   | 56 (11.9)  |
| <b>Reason for re-irradiation</b>    |            |
| Further pain relief desired         | 50 (10.6)  |
| No Response                         | 74 (15.7)  |
| Pain returned                       | 347 (73.7) |
| <b>Baseline OME (daily mg)</b>      |            |
| n                                   | 470        |
| Mean                                | 110        |
| Std                                 | 272.3      |
| Median                              | 30         |

**Appendix 2: Baseline data of patients included in the QoL analysis**

N = 338

**Treatment Arm**

|                |            |
|----------------|------------|
| Single(8Gy)    | 170 (50.3) |
| Multiple(20Gy) | 168 (49.7) |

**Age (years)**

|        |       |
|--------|-------|
| Mean   | 64.43 |
| Std    | 11.63 |
| Median | 64.35 |

**Gender**

|        |            |
|--------|------------|
| Female | 151 (44.7) |
| Male   | 187 (55.3) |

**Primary Malignancy**

|            |            |
|------------|------------|
| Breast     | 107 (31.7) |
| Prostate   | 90 (26.6)  |
| Lung       | 69 (20.4)  |
| Kidney     | 11 (3.3)   |
| Colon      | 14 (4.1)   |
| Esophageal | 7 (2.1)    |
| Rectum     | 4 (1.2)    |
| Other      | 16 (4.8)   |
| Unknown    | 10 (3.0)   |

**Karnofsky performance status**

|         |            |
|---------|------------|
| Unknown | 4 (1.2)    |
| 50-60   | 53 (15.6)  |
| 70-80   | 186 (55.1) |
| 90-100  | 95 (28.1)  |

**Worst Pain at Baseline**

|      |            |
|------|------------|
| 2-4  | 48 (14.2)  |
| 5-6  | 98 (29.0)  |
| 7-10 | 189 (55.9) |

**Site of Painful Bone Lesion**

|                       |            |
|-----------------------|------------|
| Pelvis/Hips           | 125 (37.0) |
| Lumbosacral spine     | 60 (17.8)  |
| Superficial bones     | 43 (12.7)  |
| Thoracic spine        | 33 (9.8)   |
| Upper limbs           | 27 (8.0)   |
| Lower limbs           | 21 (6.2)   |
| Thoracolumbar spine   | 21 (6.2)   |
| Cervical spine        | 4 (1.2)    |
| Cervicothoracic spine | 4 (1.2)    |

**Reason for re-irradiation**

|                             |            |
|-----------------------------|------------|
| Further pain relief desired | 33 (9.8)   |
| No Response                 | 68 (20.1)  |
| Pain returned               | 237 (70.1) |

**Baseline OME (daily mg)**

|        |       |
|--------|-------|
| n      | 338   |
| Mean   | 119.1 |
| Std    | 305.1 |
| Median | 34.5  |

**Appendix 3: BPI-PS Pain score only as criteria for response****Table 1: Baseline BPI (scale 0-10) in responders and non-responders**

| Domain/Item                 | Responders |      |     | Non-Responders |      |     | P value |
|-----------------------------|------------|------|-----|----------------|------|-----|---------|
|                             | N          | Mean | SD  | N              | Mean | SD  |         |
| General Activity            | 336        | 5.7  | 2.8 | 183            | 5.7  | 2.7 | 0.85    |
| Mood                        | 335        | 4.3  | 3.0 | 183            | 4.3  | 2.7 | 0.93    |
| Walking Ability             | 335        | 5.5  | 3.2 | 181            | 5.4  | 3.3 | 0.94    |
| Normal Work                 | 337        | 6.0  | 3.0 | 178            | 6.2  | 2.9 | 0.65    |
| Relations with Other People | 337        | 3.2  | 3.0 | 182            | 3.1  | 3.0 | 0.60    |
| Sleep                       | 337        | 4.2  | 3.1 | 182            | 4.1  | 3.0 | 0.68    |
| Enjoyment of Life           | 335        | 4.9  | 3.2 | 182            | 5.3  | 3.1 | 0.15    |

**Table 2: Change of BPI (scale 0-10) in responders and non-responders at 2 months**

| Domain/Item                 | Responders |      |     |                | Non-Responders |      |     |               | p-value    |
|-----------------------------|------------|------|-----|----------------|----------------|------|-----|---------------|------------|
|                             | N          | Mean | SD  | 95% CI         | N              | Mean | SD  | 95% CI        |            |
| General Activity            | 325        | -2.6 | 3.3 | (-2.91, -2.19) | 182            | 0.4  | 2.7 | (0.04, 0.82)  | P < 0.0001 |
| Mood                        | 324        | -2.0 | 3.3 | (-2.39, -1.68) | 181            | 0.2  | 3.2 | (-0.3, 0.64)  | P < 0.0001 |
| Walking Ability             | 327        | -2.0 | 3.5 | (-2.37, -1.62) | 179            | 0.4  | 3.0 | (0, 0.88)     | P < 0.0001 |
| Normal Work                 | 325        | -2.1 | 3.6 | (-2.46, -1.67) | 176            | 0.2  | 2.9 | (-0.2, 0.66)  | P < 0.0001 |
| Relations With Other People | 327        | -1.4 | 3.0 | (-1.74, -1.09) | 180            | 0.7  | 3.2 | (0.24, 1.19)  | P < 0.0001 |
| Sleep                       | 328        | -2.1 | 3.3 | (-2.44, -1.73) | 182            | -0.2 | 3.2 | (-0.69, 0.25) | P < 0.0001 |
| Enjoyment of Life           | 323        | -1.8 | 3.3 | (-2.18, -1.46) | 178            | 0.2  | 3.5 | (-0.29, 0.74) | P < 0.0001 |

**Table 3: BPI/Response proportion in responders and non-responders at 2 months**

| Domain/Item                 | Responder            |             | Non-Responder        |             | Chisq-p |
|-----------------------------|----------------------|-------------|----------------------|-------------|---------|
|                             | BPI change $\leq$ -2 |             | BPI change $\leq$ -2 |             |         |
|                             | Yes<br>N (%)         | No<br>N (%) | Yes<br>N (%)         | No<br>N (%) |         |
| General Activity            | 189 (58)             | 136 (42)    | 38 (21)              | 144 (79)    | <0.0001 |
| Mood                        | 166 (51)             | 158 (49)    | 58 (32)              | 123 (68)    | <0.0001 |
| Walking Ability             | 180 (55)             | 147 (45)    | 46 (26)              | 133 (74)    | <0.0001 |
| Normal Work                 | 173 (53)             | 152 (47)    | 39 (22)              | 137 (78)    | <0.0001 |
| Relations with other people | 140 (43)             | 187 (57)    | 35 (19)              | 145 (81)    | <0.0001 |
| Sleep                       | 165 (50)             | 163 (50)    | 63 (35)              | 119 (65)    | 0.0006  |
| Enjoyment of Life           | 164 (51)             | 159 (49)    | 52 (29)              | 126 (71)    | <0.0001 |

**Table 4: Baseline EORTC QLQ-C30 in responders and non-responders**

| Domain/Item           | N   | Responders |      | Non-Responders |      |      | P value |
|-----------------------|-----|------------|------|----------------|------|------|---------|
|                       |     | Mean       | SD   | N              | Mean | SD   |         |
| Physical Functioning  | 238 | 53.1       | 22.2 | 130            | 51.1 | 23.6 | 0.27    |
| Role Functioning      | 238 | 44.0       | 31.0 | 130            | 41.7 | 31.1 | 0.50    |
| Emotional Functioning | 234 | 66.9       | 22.4 | 127            | 63.1 | 25.0 | 0.22    |
| Cognitive Functioning | 237 | 74.5       | 23.7 | 130            | 70.9 | 24.7 | 0.16    |
| Social Functioning    | 235 | 62.1       | 30.4 | 129            | 58.3 | 31.9 | 0.31    |
| Fatigue               | 235 | 50.7       | 25.6 | 129            | 50.9 | 26.0 | 0.84    |
| Nausea and Vomiting   | 235 | 13.9       | 21.6 | 129            | 11.8 | 19.4 | 0.65    |
| Pain                  | 233 | 65.9       | 23.7 | 129            | 67.1 | 23.1 | 0.59    |
| Dyspnea               | 238 | 26.6       | 30.3 | 130            | 29.2 | 30.5 | 0.37    |
| Sleep                 | 235 | 41.7       | 33.6 | 129            | 42.4 | 31.4 | 0.71    |
| Appetite              | 235 | 29.4       | 33.5 | 129            | 28.2 | 30.5 | 0.99    |
| Constipation          | 234 | 28.1       | 32.6 | 129            | 34.1 | 35.0 | 0.11    |
| Diarrhea              | 235 | 7.2        | 17.7 | 129            | 7.8  | 19.8 | 0.98    |
| Financial             | 235 | 18.2       | 30.4 | 129            | 22.0 | 32.7 | 0.26    |
| Global QOL            | 235 | 49.7       | 21.1 | 128            | 48.0 | 19.4 | 0.42    |

**Table 5: Change of EORTC QLQ-C30 in responders and non-responders at 2 months**

| Domain/Item           | Responders |       |      |                  | Non-Responders |      |      |                | p-value    |
|-----------------------|------------|-------|------|------------------|----------------|------|------|----------------|------------|
|                       | N          | Mean  | SD   | 95% CI           | N              | Mean | SD   | 95% CI         |            |
| Physical Functioning  | 237        | 3.7   | 19.6 | (1.16, 6.16)     | 130            | -4.7 | 20.5 | (-8.19, -1.14) | P < 0.0001 |
| Role Functioning      | 237        | 5.9   | 31.0 | (1.96, 9.86)     | 130            | -5.3 | 31.7 | (-10.71, 0.2)  | P = 0.0008 |
| Emotional Functioning | 232        | 6.2   | 22.9 | (3.28, 9.17)     | 126            | -0.3 | 24.3 | (-4.58, 3.91)  | P = 0.03   |
| Cognitive Functioning | 235        | 3.8   | 22.6 | (0.94, 6.72)     | 130            | -2.3 | 23.6 | (-6.37, 1.76)  | P = 0.03   |
| Social Functioning    | 233        | 4.6   | 29.8 | (0.75, 8.4)      | 127            | -3.7 | 28.7 | (-8.67, 1.32)  | P = 0.02   |
| Fatigue               | 234        | -4.2  | 26.8 | (-7.61, -0.75)   | 128            | 4.1  | 22.1 | (0.25, 7.91)   | P = 0.004  |
| Nausea and Vomiting   | 233        | -1.1  | 25.8 | (-4.45, 2.17)    | 128            | 1.3  | 23.5 | (-2.51, 5.64)  | P = 0.3    |
| Pain                  | 230        | -24.1 | 29.3 | (-27.85, -20.27) | 124            | -2.3 | 25.4 | (-6.76, 2.19)  | P < 0.0001 |
| Dyspnea               | 236        | 1.3   | 30.2 | (-2.58, 5.12)    | 129            | 2.3  | 29.1 | (-2.43, 7.6)   | P = 0.6    |
| Sleep                 | 233        | -15.0 | 37.2 | (-19.8, -10.24)  | 129            | -4.4 | 28.7 | (-9.34, 0.56)  | P = 0.004  |
| Appetite              | 234        | -2.7  | 37.9 | (-7.56, 2.15)    | 128            | 4.2  | 32.4 | (-1.45, 9.78)  | P = 0.1    |
| Constipation          | 232        | -6.2  | 32.6 | (-10.37, -1.98)  | 126            | -4.2 | 26.8 | (-10.65, 2.18) | P = 0.7    |
| Diarrhea              | 233        | 3.9   | 26.1 | (0.52, 7.21)     | 128            | 6.5  | 25.1 | (2.16, 10.86)  | P = 0.5    |
| Financial             | 233        | -1.6  | 24.0 | (-4.66, 1.51)    | 128            | 3.9  | 21.2 | (0.24, 7.57)   | P = 0.08   |
| Global QOL            | 229        | 4.9   | 24.2 | (1.81, 8.09)     | 125            | -3.7 | 22.4 | (-7.59, 0.26)  | P = 0.0006 |

**Table 6: QOL/Response proportion in responders and non-responders at 2 months**

| Domain/Item           | Responders           |             | Non-Responders       |             | Chisq-p |
|-----------------------|----------------------|-------------|----------------------|-------------|---------|
|                       | QOL change $\geq$ 10 |             | QOL change $\geq$ 10 |             |         |
|                       | Yes<br>N (%)         | No<br>N (%) | Yes<br>N (%)         | No<br>N (%) |         |
| Physical Functioning  | 83 (35)              | 154 (65)    | 26 (20)              | 104 (80)    | 0.0026  |
| Role Functioning      | 105 (44)             | 132 (56)    | 36 (28)              | 94 (72)     | 0.0018  |
| Emotional Functioning | 88 (38)              | 144 (62)    | 35 (28)              | 91(72)      | 0.0534  |
| Cognitive Functioning | 89 (38)              | 146 (62)    | 41 (32)              | 89 (68)     | 0.2262  |
| Social Functioning    | 88 (38)              | 145 (62)    | 44 (35)              | 83 (65)     | 0.5569  |
| Global QOL            | 83 (36)              | 146 (64)    | 27 (22)              | 98 (78)     | 0.0044  |

  

| Domain/Item  | QOL change $\geq$ 10 |             | QOL change $\geq$ 10 |             | Chisq-p |
|--------------|----------------------|-------------|----------------------|-------------|---------|
|              | QOL change $\geq$ 10 |             | QOL change $\geq$ 10 |             |         |
|              | Yes<br>N (%)         | No<br>N (%) | Yes<br>N (%)         | No<br>N (%) |         |
| Fatigue      | 102 (44)             | 132 (56)    | 37 (29)              | 91 (71)     | 0.0060  |
| Nausea       | 61 (26)              | 172 (74)    | 31 (24)              | 97 (76)     | 0.6824  |
| Pain         | 166 (72)             | 64 (28)     | 47 (38)              | 77 (62)     | <0.0001 |
| Dyspnea      | 47 (20)              | 189 (80)    | 25 (19)              | 104 (81)    | 0.9022  |
| Sleep        | 102 (44)             | 131 (56)    | 40 (31)              | 89 (69)     | 0.0172  |
| Appetite     | 67 (29)              | 167 (71)    | 26 (20)              | 102 (80)    | 0.0833  |
| Constipation | 71 (31)              | 161 (69)    | 38 (30)              | 88 (70)     | 0.9304  |
| Diarrhea     | 22 (9)               | 211 (91)    | 10 (8)               | 118 (92)    | 0.6023  |
| Financial    | 33 (14)              | 200 (86)    | 12 (9)               | 116 (91)    | 0.1877  |

**Table 7: Left panel: difference in BPI scores between ICE responders and pain score only responders. Right panel: difference in scores between ICE non-responders and pain score only non-responders.**

| Domain/Item                 | Responders* |                 |         | Non-Responders |                |          |
|-----------------------------|-------------|-----------------|---------|----------------|----------------|----------|
|                             | Mean        | 95% CI          | p-value | Mean           | 95% CI         | p-value  |
| General Activity            | -0.2        | (-0.47, 0.07)   | 0.14    | -0.7           | (-1.05, -0.38) | p<0.0001 |
| Mood                        | -0.3        | (-0.57, -0.001) | 0.05    | -0.5           | (-0.87, -0.16) | 0.004    |
| Walking Ability             | -0.2        | (-0.46, 0.11)   | 0.24    | -0.6           | (-0.95, -0.23) | 0.001    |
| Normal Work                 | -0.3        | (-0.56, 0.03)   | 0.08    | -0.5           | (-0.92, -0.17) | 0.005    |
| Relations with Other People | -0.2        | (-0.42, 0.12)   | 0.28    | -0.5           | (-0.86, -0.17) | 0.003    |
| Sleep                       | -0.02       | (-0.31, 0.27)   | 0.89    | -0.6           | (-0.95, -0.23) | 0.001    |
| Enjoyment of Life           | -0.2        | (-0.54, 0.05)   | 0.11    | -0.4           | (-0.79, -0.05) | 0.03     |

\* Note: Difference of BPI/QoL between ICE and pain score only was calculated using a weighted average of the 6 patient groups: A: pain score responders and ICE responders, B: pain score responders and ICE non-responders, C: pain score non-responders and ICE responders, D: pain score non-responders and ICE non-responders, E: pain score responders and ICE missing, F: pain score non-responders and ICE missing. The corresponding 95% C.I and p-value were based on the generalized linear models.

**Table 8: Left panel: difference in QoL scores between ICE responders and pain score only responders. Right panel: difference in scores between ICE non-responders and pain only non-responders.**

| Domain/Item           | Responders |                |         | Non-Responders |               |         |
|-----------------------|------------|----------------|---------|----------------|---------------|---------|
|                       | Mean       | 95% CI         | p-value | Mean           | 95% CI        | p-value |
| Physical Functioning  | 3.1        | (1.17, 5.11)   | 0.002   | -1.2           | (-3.76, 1.32) | 0.3     |
| Role Functioning      | 4.2        | (1.04, 7.30)   | 0.009   | 0.004          | (-4.03, 4.03) | 0.998   |
| Emotional Functioning | 2.9        | (0.54, 5.35)   | 0.02    | -0.48          | (-3.56, 2.61) | 0.7     |
| Cognitive Functioning | 1.4        | (-0.99, 3.72)  | 0.26    | 0.3            | (-2.71, 3.29) | 0.9     |
| Social Functioning    | 2.5        | (-0.45, 5.50)  | 0.1     | 0.4            | (-3.48, 4.24) | 0.8     |
| Fatigue               | -2.9       | (-5.47, -0.33) | 0.03    | 0.5            | (-2.76, 3.81) | 0.8     |
| Nausea and Vomiting   | -1.3       | (-3.90, 1.23)  | 0.3     | 0.6            | (-2.71, 3.85) | 0.7     |
| Pain                  | -4.0       | (-6.85, -1.20) | 0.005   | -2.3           | (-5.92, 1.32) | 0.2     |
| Dyspnea               | 0.7        | (-2.37, 3.73)  | 0.7     | -0.8           | (-4.69, 3.18) | 0.7     |
| Sleep                 | -0.5       | (-4.11, 3.02)  | 0.8     | -2.1           | (-6.57, 2.42) | 0.4     |
| Appetite              | -3.0       | (-6.73, 0.64)  | 0.1     | 2.3            | (-2.36, 7.04) | 0.3     |
| Constipation          | -2.7       | (-6.19, 0.88)  | 0.14    | 2.2            | (-2.30, 6.68) | 0.3     |
| Diarrhea              | 2.5        | (-0.12, 5.17)  | 0.06    | -1.8           | (-5.20, 1.53) | 0.3     |
| Financial             | 1.4        | (-0.97, 3.72)  | 0.25    | -1.0           | (-4.04, 1.99) | 0.5     |
| Global QOL            | 3.2        | (0.79, 5.58)   | 0.01    | -1.0           | (-4.13, 2.13) | 0.5     |
